# Supplementary material for: Rationalizing Graphene–ZnO Composites for Gas Sensing via Functionalization with Amines
Source: MDPI journal article supplement (doi:10.3390/nano14090735), 2024-04-23
Supplement: s1 [file s1]

Supporting Information for:

## Rationalizing the formation of graphene-ZnO composites for gas sensing by applying graphene amination

Maxim K. Rabchinskii <sup>1\*</sup>, Victor. V. Sysoev <sup>2</sup>, Sergei A. Ryzhkov <sup>1,2</sup>, Maksim A. Solomatin <sup>2</sup>, Vladimir S. Gabrelian <sup>1</sup>, Demid A. Kirilenko <sup>1</sup>, Dina Yu. Stolyarova <sup>3</sup>, Sviatoslav D. Saveliev <sup>1,2</sup>, Alexander V. Shvidchenko <sup>1</sup>, Polina D. Cherviakova <sup>1</sup>, Alexey S. Varezchnikov <sup>2</sup>, Sergei I. Pavlov <sup>1</sup>, Maria Brzhezinskaya <sup>4</sup>, Boris G. Khalturin <sup>1</sup>, Nikita D. Prasolov <sup>1</sup>, Pavel N. Brunkov <sup>1</sup>

<sup>1</sup> Ioffe Institute, Politekhnikeskaya St. 26, Saint Petersburg, 194021, Russia;

<sup>2</sup> Yuri Gagarin State Technical University of Saratov, Saratov 410054, Russia

<sup>3</sup> NRC "Kurchatov Institute", Akademika Kurchatova pl. 1, Moscow, 123182, Russia

<sup>4</sup> Helmholtz-Zentrum Berlin für Materialien und Energie, Hahn-Meitner-Platz 1, 14109 Berlin, Germany;

\* - Dr. Maxim K. Rabchinskii, Ioffe Institute, Politekhnikeskaya St. 26, Saint Petersburg, 194021, Russia,  
e-mail: [rabchinskii@mail.ioffe.ru](mailto:rabchinskii@mail.ioffe.ru)

### Section S1. Experimental setup for the gas-sensing studies

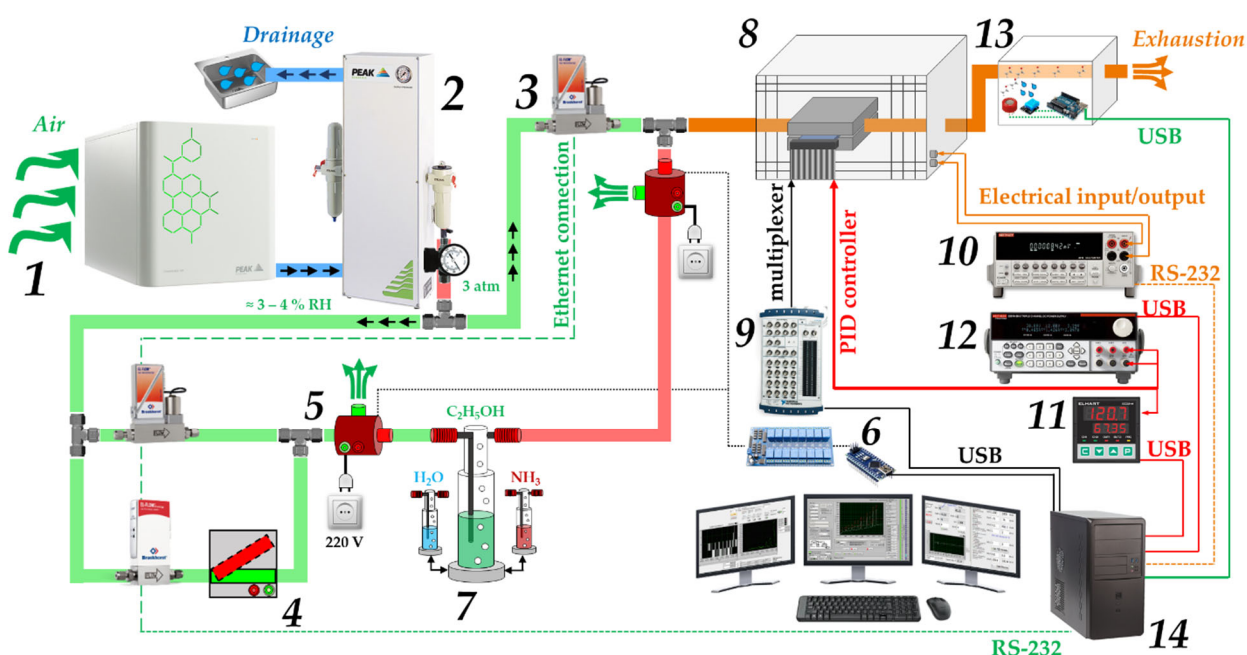

**Figure S1.** The scheme of the experimental setup to study the chemiresistive response of graphene-based chips: 1 – air compressor; 2 – filter dryer; 3 – precise mass-flow controller; 4 – two-way valve; 5 – three-way valve; 6 – relay, controlling the valves; 7 – bubblers, containing the analytes; 8 – Faraday cage, containing the chip mounted into a sealed stainless-steel chamber; 9 – data acquisition platform, NI-DAQ; 10 – multimeter (Keithley-2000); 11 – PID controller; 12 – power source for the heaters on the chip; 13 – exhaustion; 14 – PC with a home-made software to manage the setup.

## S2. TEM characterization of the initial GO

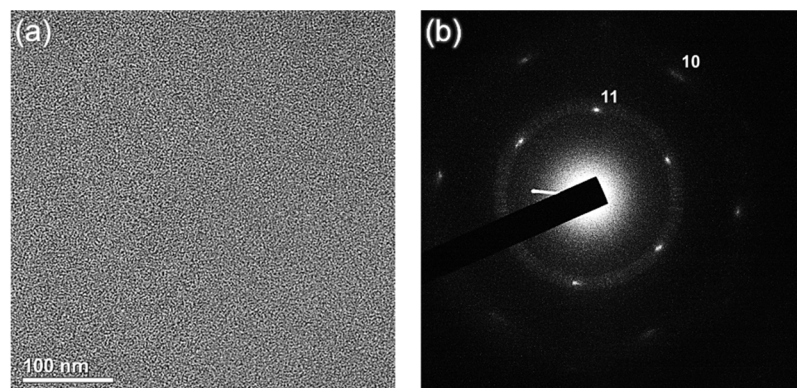

**Figure S2.** (a) TEM image and (b) the corresponding ED pattern of the initial graphene oxide

## S3. Size distribution of the ZnO nanoparticles

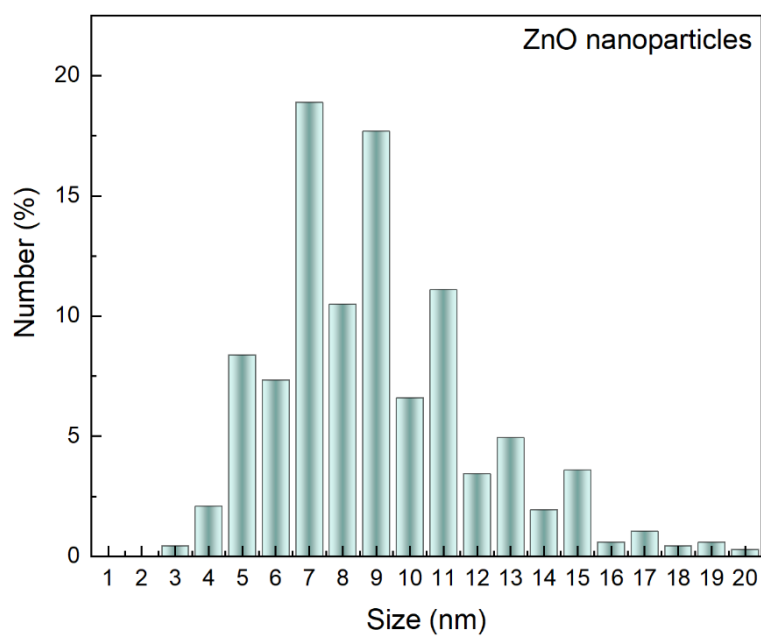

**Figure S3.** Size distribution of the ZnO nanoparticles derived from the collected TEM images

#### S4. TEM characterization of the initial rGO-ZnO composite

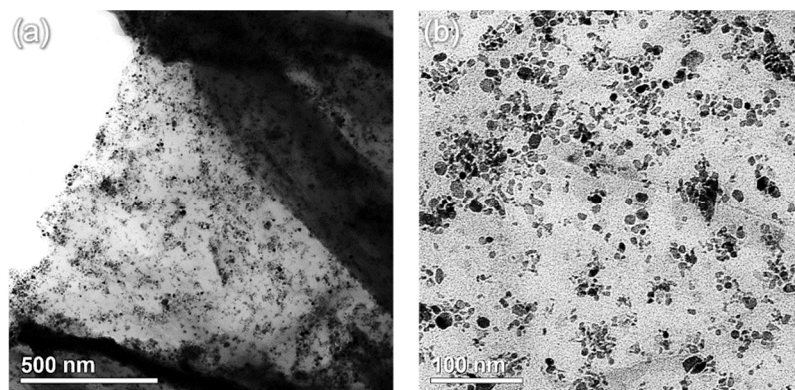

**Figure S4.** TEM images of the rGO-ZnO layer at different magnifications.

#### S5. TEM characterization of the initial rGO-ZnO composite after annealing

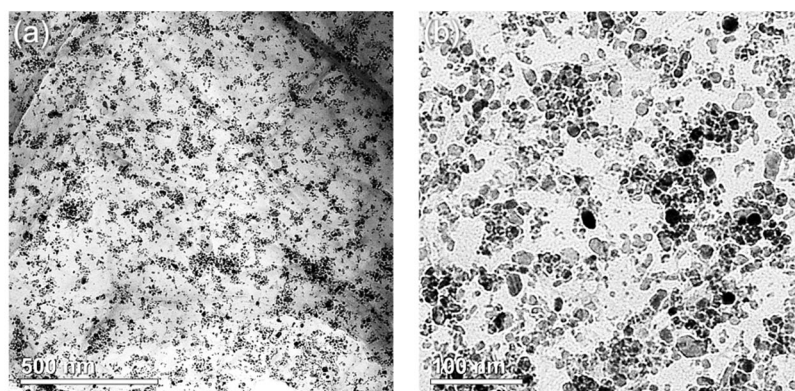

**Figure S5.** TEM images of the rGO-ZnO layer after annealing at different magnifications.

## S6. Comparison of the On-chip multisensor array' performance towards the NH<sub>3</sub> and EtOH detection in dry air with the state-of-art graphene/carbon nanotubes-based gas sensing device

**Table S1.** Comparison of the gas sensors' performance towards the NH<sub>3</sub> detection

| No. | Sensor type                                   | Operating temperature | LoD      | Recovery time | Selective detection of NH <sub>3</sub> | Reference |
|-----|-----------------------------------------------|-----------------------|----------|---------------|----------------------------------------|-----------|
| 1   | On-chip multisensor array comprised of Am-ZnO | RT                    | 5.1 ppm  | 7 min         | Yes (LDA analysis)                     | This work |
| 2   | rGO-TiO <sub>2</sub>                          | RT                    | ~1 ppm   | 5 min         | Yes                                    | [R1]      |
| 3   | Holey rGO                                     | RT                    | <1 ppm   | ~1 min        | Yes                                    | [R2]      |
| 4   | Carbon nanotubes network                      | RT                    | > 10 ppm | 10 min        | Yes                                    | [R3]      |
| 5   | Carboxylated graphene                         | RT                    | <1 ppm   | >20 min       | Yes (LDA analysis)                     | [R4]      |
| 6   | Laser-synthesized graphene                    | RT                    | ~10 ppm  | 3.5 min       | Yes                                    | [R5]      |
| 7   | Fluorinated graphene                          | RT                    | ~5 ppm   | >4 min        | Yes                                    | [R6]      |
| 8   | Phosphorus-doped graphene                     | RT                    | 0.5 ppm  | ~ 2 min       | Yes                                    | [R7]      |
| 9   | Carbonylated Graphene                         | RT                    | <1 ppm   | 20 min        | Yes (LDA analysis)                     | [R8]      |

**Table S2.** Comparison of the gas sensors' performance towards the EtOH detection

| No. | Sensor type                                                         | Operating temperature | LoD              | Recovery time | Selective detection of EtOH | Reference |
|-----|---------------------------------------------------------------------|-----------------------|------------------|---------------|-----------------------------|-----------|
| 1   | On-chip multisensor array comprised of Am-ZnO                       | RT                    | 3.6 ppm          | 7 min         | Yes (LDA analysis)          | This work |
| 2   | GO with chemically diverse amine ligands                            | RT                    | 25 ppm           | 1.5-7 min     | No                          | [R9]      |
| 3   | rGO-SnO <sub>2</sub> composite chemiresistor sensor                 | RT                    | 3 ppm            | 2-3 min       | No                          | [R10]     |
| 5   | CoOEP-functionalized SWNT chemiresistor sensor                      | RT                    | ~2 ppm           | 90 s          | No                          | [R11]     |
| 6   | Pt-activated SnO <sub>2</sub> nanoparticles partly wrapped by (RGO) | 110 °C                | >100 ppm         | 20 s          | No                          | [R12]     |
| 7   | GO-aniline composite                                                | RT                    | 500 ppm          | 27 ms         | No                          | [R13]     |
| 8   | Inkjet-Printed rGO                                                  | RT                    | Saturated vapors | ~ 20 min      | No                          | [R14]     |
| 9   | CVD-grown graphene nanoribbon films                                 | 150 °C                | 2 ppm            | 15 min        | Yes (LDA analysis)          | [R15]     |

**References:**

- R1.** Ye, Z.; Tai, H.; Guo, R.; Yuan, Z.; Liu, C.; Su, Y.; Chen, Z.; Jiang, Y. Excellent ammonia sensing performance of gas sensor based on graphene/titanium dioxide hybrid with improved morphology. *Appl. Surf. Sci.* **2017**, *419*, 84–90. <https://doi.org/10.1016/j.apsusc.2017.03.251>.
- R2.** Yang, M.; Wang, Y.; Dong, L.; Xu, Z.; Liu, Y.; Hu, N.; Kong, E. S. W.; Zhao, J.; Peng, C. Gas Sensors Based on Chemically Reduced Holey Graphene Oxide Thin Films. *Nanoscale Res. Lett.* **2019**, *14*, 1–8. <https://doi.org/10.1186/s11671-019-3060-5>.
- R3.** Rigoni, F.; Freddi, S.; Pagliara, S.; Drera, G.; Sangaletti, L.; Suisse, J.-M.; Bouvet, M.; Malovichko, A. M.; Emelianov, A. V.; Bobrinetskiy, I. I. Humidity-enhanced sub-ppm sensitivity to ammonia of covalently functionalized single-wall carbon nanotube bundle layers. *Nanotechnology* **2017**, *28*, 255502. <https://doi.org/10.1088/1361-6528/aa6da7>.
- R4.** Rabchinskii, M. K.; Sysoev, V. V.; Glukhova, O. E.; Brzhezinskaya, M.; Stolyarova, D. Yu.; Varezchnikov, A. S.; Solomatin, M. A.; Barkov, P. V.; Kirilenko, D. A.; Pavlov, S. I. et al. Guding graphene Derivatization for the On-Chip Multisensor Arrays: From the Synthesis to the Theoretical Background. *Adv. Mater. Technol.* **2022**, *7*, 2101250. <https://doi.org/10.1002/admt.202101250>.
- R5.** Wu, D.; Peng, Q.; Wu, S.; Wang, G.; Deng, L.; Tai, H.; Wang, L.; Yang, Y.; Dong, L.; Zhao, Y.; et al. A Simple Graphene NH<sub>3</sub> Gas Sensor via Laser Direct Writing. *Sensors* **2018**, *18*, 4405. <https://doi.org/10.3390/s18124405>.
- R6.** Yuan, W.; Shi, G. Graphene-based gas sensors. *J. Mater. Chem. A* **2023**, *1*, 10078-10091. <https://doi.org/10.1039/C3TA11774J>.
- R7.** Niu, F.; Tao, L. M.; Deng, Y. C.; Wang, Q. H.; Song, W. G. Phosphorus doped graphene nanosheets for room temperature NH<sub>3</sub> sensing. *New J. Chem.*, **2014**, *38*, 2269-2272. <https://doi.org/10.1039/C4NJ00162A>.
- R8.** Rabchinskii, M. K.; Varezchnikov, A. S.; Sysoev, V. V.; Solomatin, M. A.; Ryzhkov, S. A.; Baidakova, M. V.; Stolyarova, D. Yu.; Shnitov, V. V.; Pavlov, S. I.; Kirilenko, D. A. et al. Hole-matrixed carbonylated graphene: synthesis, properties,

and highly-selective ammonia gas sensing. *Carbon* **2021**, *172*, 236-247. <https://doi.org/10.1016/j.carbon.2020.09.087>.

**R9.** Liu, B.; Huang, Y.; Kam, K. W.L.; Cheung, W.-F.; Zhao, N.; Zheng, B. Functionalized Graphene-Based Chemiresistive Electronic Nose for Discrimination of Disease-Related Volatile Organic Compounds. *Biosens. Bioelectron.: X* **2019**, *1*, 100016. <https://doi.org/10.1016/j.biosx.2019.100016>.

**R10.** Pienutsa, N.; Roongruangsree, P.; Seedokbuab, V.; Yannawibut, K.; Phatoomvijitwong, C.; Srinives, S. SnO<sub>2</sub>-Graphene Composite Gas Sensor for a Room Temperature Detection of Ethanol. *Nanotechnology* **2021**, *32*, 115502. <https://doi.org/10.1088/1361-6528/abcfea>.

**R11.** Shirsat, S. M.; Bodkhe, G. A.; Sonawane, M. M.; Gawali, B. W.; Shirsat, M. D. Multivariate Analysis of a Cobalt Octaethyl Porphyrin-Functionalized SWNT Microsensor Device for Selective and Simultaneous Detection of Multiple Analytes. *J. Electron. Mater.* **2021**, *50*, 5780 – 5787. <https://doi.org/10.1007/s11664-021-09111-3>.

**R12.** Peng, R.; Chen, J.; Nie, X.; Li, D.; Si, P.; Feng, J.; Zhang, L.; Ci, L. Reduced Graphene Oxide Decorated Pt Activated SnO<sub>2</sub> Nanoparticles for Enhancing Methanol Sensing Performance. *J. Alloys Compd.* **2018**, *762*, 8-15. <https://doi.org/10.1016/j.jallcom.2018.05.177>.

**R13.** Zhu, X.; Zhang, J.; Xie, Q.; Hou, Z.-L. High-Sensitivity and Ultrafast-Response Ethanol Sensors Based on Graphene Oxide. *ACS Appl. Mater. Interfaces* **2020**, *12*, 38708–38713. <https://doi.org/10.1021/acsami.0c12196>.

**R14.** Dua, V.; Asurwade, S. P.; Ammu, S.; Agnihotra, S. R.; Jain, S.; Roberts, K. E.; Park, S.; Ruoff, R. S.; Manohar, S. K. All-Organic Vapor Sensor Using Inkjet-Printed Reduced Graphene Oxide. *Angew. Chem. Int. Ed.* **2010**, *49*, 2154. <https://doi.org/10.1002/anie.200905089>.

**R15.** Shekhirev, M.; Lipatov, A.; Torres, A.; Vorobeve, N.; Harkleroad, A.; Lashkov, A.; Sysoev, V.; Sinitskii, A. Highly Selective Gas Sensors Based on Graphene Nanoribbons Grown by Chemical Vapor Deposition. *ACS Appl. Mater. Interfaces* **2020**, *12*, 7392-7402. <https://doi.org/10.1021/acsami.9b13946>.
